# Supplementary material for: Adequate life-expectancy reconstruction for adult human mortality data
Source: PubMed Central journal article supplement (PMC5986123; doi:10.1371/journal.pone.0198485), 2018-06-04
Supplement: pone.0198485.s001.pdf [file pone.0198485.s001.pdf]

## Supporting Information

The hunter-gatherer data are published in [1] for the Ache, in [2] for the Hadza, in [3] for the Hiwi and in [4] for the Tsimane populations.

**Table 1.** Life expectancy at birth for hunter-gatherer populations in Fig 1.

| Population | Sex    | Life-table $e_0$ | FGM $e_0$ | Siler $e_0$ |
|------------|--------|------------------|-----------|-------------|
| Ache       | Female | 47.64            | 34.22     | 37          |
| Hadza      | Female | 38.07            | 34.61     | 34          |
| Hiwi       | Female | 28.89            | 25.18     | 27          |
| Tsimane    | Male   | 44.59            | 43.72     | 42          |

The contemporary human population data analyzed in the manuscript are freely available in the Human Mortality Database [5], the Human Life-table Database [6], the World Population Prospects [7], and the World Health Organization Global Health Observatory [8] and the Database maintained by Eurostat [9].

**Table 2.** Life expectancy for populations from [6] in Fig 1.

| Population        | Period    | Sex    | Censoring Age | Life-table $e_0$ | FGM $e_0$ |
|-------------------|-----------|--------|---------------|------------------|-----------|
| Bangladesh        | 1974      | Female | 70            | 49.30            | 46.31     |
| India             | 1986      | Male   | 70            | 55.78            | 52.72     |
| Colombia          | 2005      | Female | 80            | 77.11            | 74.28     |
| Republic of Korea | 1995      | Male   | 85            | 69.53            | 67.23     |
| Sri Lanka         | 2000-2002 | Male   | 85            | 70.29            | 66.70     |
| Malta             | 2007      | Male   | 85            | 77.23            | 74.14     |
| Mongolia          | 1996-2000 | Female | 70            | 66.57            | 66.25     |

## References

1. Hill KR, Hurtado AM. Ache Life History: The Ecology and Demography of a Foraging People. New York: Aldine de Gruyter; 1996.
2. Blurton Jones NG, Hawkes K, O’Connell JF. Antiquity of postreproductive life: Are there modern impacts on hunter-gatherer postreproductive life spans? *American Journal of Human Biology*. 2002;14(2):184–205. doi:10.1002/ajhb.10038.
3. Hill K, Hurtado AM, Walker RS. High adult mortality among Hiwi hunter-gatherers: Implications for human evolution. *Journal of Human Evolution*. 2007;52(4):443–454. doi:10.1016/j.jhevol.2006.11.003.

4. Gurven M, Kaplan H, Supa AZ. Mortality experience of Tsimane Amerindians of Bolivia: regional variation and temporal trends. *American Journal of Human Biology*. 2007;19(3):376–398. doi:10.1002/ajhb.20600.
5. HMD. The Human Mortality Database; 2017. <http://www.mortality.org/>.
6. HLD. The Human Life-Table Database; 2017. <http://www.lifetable.de/>.
7. WPP. The 2015 Revision of World Population Prospects; 2015. Available from: <http://esa.un.org/unpd/wpp/Download/Standard/Mortality/>.
8. WHO. World Health Organization Global Health Observatory Data Repository; 2017. [http://www.who.int/gho/mortality\\_burden\\_disease/life\\_tables/life\\_tables/en/](http://www.who.int/gho/mortality_burden_disease/life_tables/life_tables/en/).
9. Eurostat. Eurostat Database and metadata information; 2018. <http://ec.europa.eu/eurostat/data/database>, [http://ec.europa.eu/eurostat/cache/metadata/Annexes/demo\\_mor\\_esms\\_an1.pdf](http://ec.europa.eu/eurostat/cache/metadata/Annexes/demo_mor_esms_an1.pdf), Accessed: 2018-01-11.
